# Supplementary material for: Predominance of cis-regulatory changes in parallel expression divergence of sticklebacks
Source: bioRxiv or medRxiv preprint supplement (doi:10.1101/412932), 2018-11-27
Supplement: Supplementary file [file 412932-2.pdf]

Table S1. Sampling locations

| Sampling locations    | Freshwater sampling coordinates | Marine sampling coordinates  |
|-----------------------|---------------------------------|------------------------------|
| River Tyne            | 55°56'34.8"N 2°47'6"W           | 56°0'22.63"N 2°36'47.41"W    |
| River Forss           | 58°34'22.949"N 3°38'27.916"W    | 58°36'32.335"N 3°40'42.404"W |
| River Shiel           | 56°44'52.8"N 5°41'52.8"W        | 56°46'45.99"N 5°49'44.47"W   |
| Little Campbell River | 49°0'43.65"N 122°37'30.44"W     | 49°0'58.03"N 122°46'46.37"W  |

Table S2. RNA-seq library sequencing and yield.

| Sample ID     | Sampling location | Ecotype  | Sequencing run      | Sequencing lane | Mapped reads * |          |
|---------------|-------------------|----------|---------------------|-----------------|----------------|----------|
| c363_P_FC18_M | Little River      | Campbell | Freshwater (parent) | 48              | 1              | 41570029 |
| c363_P_FC08_F | Little River      | Campbell | Marine (parent)     | 48              | 1              | 77071816 |
| c358_P_FC12_F | Little River      | Campbell | Freshwater          | 48              | 2              | 51196050 |
| c358_P_FC09_M | Little River      | Campbell | Marine              | 48              | 2              | 62721395 |
| c357_P_FC14_F | Little River      | Campbell | Freshwater          | 48              | 2              | 51219036 |
| c357_P_FC06_M | Little River      | Campbell | Marine              | 48              | 2              | 49172261 |
| c353_P_FC15_M | Little River      | Campbell | Freshwater          | 48              | 2              | 62929997 |
| c353_P_FC05_F | Little River      | Campbell | Marine              | 48              | 2              | 40600091 |
| c209_P_422_M  | River Tyne        |          | Freshwater          | 39              | 7              | 57545801 |
| c209_P_341_FM | River Tyne        |          | Marine              | 39              | 7              | 65354927 |
| c208_P_531_M  | River Tyne        |          | Marine              | 39              | 7              | 51827643 |
| c208_P_321_FM | River Tyne        |          | Freshwater          | 39              | 7              | 59257432 |
| c172_P_533_M  | River Tyne        |          | Freshwater (parent) | 14              | 8              | 37475539 |
| c172_P_533_M  | River Tyne        |          | Freshwater (parent) | 14              | 3              | 37561905 |
| c172_P_532_F  | River Tyne        |          | Marine (parent)     | 48              | 2              | 32355769 |
| c172_P_532_F  | River Tyne        |          | Marine (parent)     | 14              | 8              | 29421104 |
| c172_P_532_F  | River Tyne        |          | Marine (parent)     | 14              | 3              | 30491397 |
| c169_P_432_FM | River Tyne        |          | Freshwater          | 39              | 7              | 46449279 |
| c169_P_342_M  | River Tyne        |          | Marine              | 39              | 7              | 60308422 |
| c214_P_524_FM | River Shiel       |          | Marine (parent)     | 39              | 6              | 63867976 |
| c214_P_512_M  | River Shiel       |          | Freshwater (parent) | 39              | 6              | 51993114 |
| c212_P_551_M  | River Forss       |          | Freshwater (parent) | 39              | 5              | 78491454 |
| c212_P_454_FM | River Forss       |          | Marine (parent)     | 39              | 5              | 53915757 |
| c363_F1_1_M   | Little River      | Campbell | F1                  | 48              | 1              | 51918812 |
| c363_F1_1_F   | Little River      | Campbell | F1                  | 48              | 1              | 75548850 |
| c363_F1_2_M   | Little River      | Campbell | F1                  | 48              | 1              | 56909054 |
| c363_F1_2_F   | Little River      | Campbell | F1                  | 48              | 1              | 49711377 |
| c172_F1_04_M  | River Tyne        |          | F1                  | 14              | 8              | 43447943 |
| c172_F1_04_F  | River Tyne        |          | F1                  | 14              | 8              | 30068470 |
| c172_F1_20_M  | River Tyne        |          | F1                  | 14              | 3              | 26736357 |
| c172_F1_20_F  | River Tyne        |          | F1                  | 14              | 3              | 42657169 |
| c214_F1_2_M   | River Shiel       |          | F1                  | 39              | 6              | 67202528 |
| c214_F1_2_FM  | River Shiel       |          | F1                  | 39              | 6              | 51160598 |
| c214_F1_1_M   | River Shiel       |          | F1                  | 39              | 6              | 58378310 |
| c214_F1_1_FM  | River Shiel       |          | F1                  | 39              | 6              | 62005808 |
| c212_F1_2_M   | River Forss       |          | F1                  | 39              | 5              | 52427751 |
| c212_F1_2_FM  | River Forss       |          | F1                  | 39              | 5              | 62315657 |
| c212_F1_1_M   | River Forss       |          | F1                  | 39              | 5              | 56085728 |
| c212_F1_1_FM  | River Forss       |          | F1                  | 39              | 5              | 53416036 |

\* uniquely mapped reads

Table S4. Criteria for defining divergence classes following {Landry:2005vf}.

| Divergence class | Alleles - Binomial test | Parents - Binomial test | ASE versus Parents - Fisher test | Additional                        |
|------------------|-------------------------|-------------------------|----------------------------------|-----------------------------------|
| cis              | ** (A1≠A2)              | ** (P1≠ P2)             | NS (P1/P2 = A1/A2)               | NA                                |
| trans            | NS (A1= A2)             | ** (P1 ≠ P2)            | ** (P1/P2 ≠ A1/A2)               | NA                                |
| cis + trans      | ** (A1≠A2)              | ** (P1≠ P2)             | ** (P1/P2 ≠ A1/A2)               | $\log_2(P1/P2)/\log_2(A1/A2) > 1$ |
| cis - trans      | ** (A1≠A2)              | ** (P1≠ P2)             | ** (P1/P2 ≠ A1/A2)               | $\log_2(P1/P2)/\log_2(A1/A2) < 1$ |
| compensatory     | ** (A1≠A2)              | NS (P1 = P2)            | ** (P1/P2 ≠ A1/A2)               | NA                                |
| conserved        | NS (A1 = A2)            | NS (P1 = P2)            | NS (P1/P2 = A1/A2)               | NA                                |

A1 - allele 1, A2 - allele 2, P1 - parent 1, P2 - parent 2, \*\* - statistically significant with FDR 10%, NS - non-significant with FDR 10%
